# Supplementary material for: Comparative Aerial and Ground Based High Throughput Phenotyping for the Genetic Dissection of NDVI as a Proxy for Drought Adaptive Traits in Durum Wheat
Source: Front Plant Sci. 2018 Jun 26;9:893. doi: 10.3389/fpls.2018.00893 (PMC6028805; doi:10.3389/fpls.2018.00893)
Supplement: Supplementary file 4 [file Table_4.XLSX]

## Sheet: Fst
Title: Comparative Aerial and Ground Based High Throughput Phenotyping for the Genetic Dissection of NDVI as a Proxy for Drought Adaptive Traits in Durum Wheat
Authors: GIUSEPPE EMANUELE CONDORELLI1, MARCO MACCAFERRI1, MARIA NEWCOMB2, PEDRO ANDRADE-SANCHEZ2, JEFFREY W. WHITE3, ANDREW N. FRENCH3, GIUSEPPE SCIARA1, RICK WARD2 AND ROBERTO TUBEROSA1.
Affiliations: 1 Department of Agricultural Sciences, University of Bologna, Italy. 2 Maricopa Agricultural Center (MAC), University of Arizona,USA. 3 US Arid-Land Agricultural Research Center, USDA-ARS, Maricopa, AZ, USA
Supplementary Table 4 | Fixation Index (Fst) of population differentiation due to genetic structure (STRUCTURE 2.3.4). The subgroup 1 (S1) included eight ancient Italian accessions; subgroup 2 (S2) included sixteen accessions, which mainly included Spanish cultivars from Institute of Agrifood Research and Technology (IRTA) and Moroccan cultivars from National Institute for Agricultural Research (…
Subgroup	Fixation Index (Fst)
S1	0.52
S2	0.41
S3	0.50
S4	0.87
S5	0.78
S6	0.83
S7	0.86
S8	0.52
