# Supplementary material for: Comparative Aerial and Ground Based High Throughput Phenotyping for the Genetic Dissection of NDVI as a Proxy for Drought Adaptive Traits in Durum Wheat
Source: Front Plant Sci. 2018 Jun 26;9:893. doi: 10.3389/fpls.2018.00893 (PMC6028805; doi:10.3389/fpls.2018.00893)
Supplement: Supplementary file 9 [file Table_9.XLSX]

## Sheet: Foglio1
Title: Comparative Aerial and Ground Based High Throughput Phenotyping for the Genetic Dissection of NDVI as a Proxy for Drought adaptive Traits in Durum Wheat
Authors: GIUSEPPE EMANUELE CONDORELLI1, MARCO MACCAFERRI1, MARIA NEWCOMB2, PEDRO ANDRADE-SANCHEZ2, JEFFREY W. WHITE3, ANDREW N. FRENCH3, GIUSEPPE SCIARA1, RICK WARD2 AND ROBERTO TUBEROSA1
Affiliations: 1 Department of Agricultural Sciences, University of Bologna, Italy. 2 Maricopa Agricultural Center (MAC), University of Arizona,USA. 3 US Arid-Land Agricultural Research Center, USDA-ARS, Maricopa, AZ, USA
Supplementary Table 9 | List of QTLs and Global R2 of multiple QTL model for NDVI from UAV-RedEdge on two different days after planting (DAP): 91 and 98. The confidence interval of ±3.0 cM based on map positions of QTL tag-SNPs was used to define each QTL region. 1) Allele effect: a = E-03; b = E-04.
Trait	Method	DAP	Marker	Chr.	Position (cM)	Significance Interval left (cM)	Significance Interval right (cM)	Alleles	Effect	-log(p-value)	R2 (%)
			IWB72875	1A	37.1	34.1	40.1	C/T	-80.1	3.12	4.29
			IWB20278	1B	45.4	42.4	48.4	C/T	10a (1)	4.22	6.14
			IWB31673	1B	59.1	56.1	62.1	C/T	-126	4.07	5.89
			IWA2526	2A	46.6	43.6	49.6	C/T	-115	4.40	6.40
			IWB32315	2B	5.9	2.9	8.9	A/G	-114	3.18	4.39
			IWB11224	3A	5.3	2.3	8.3	C/T	10a	3.64	5.16
			IWB22345	4A	160.2	157.2	163.2	C/T	70b	3.38	4.71
NDVI	UAV-RedEdge	91	IWB28274	4B	4.8	1.8	7.8	C/T	80b	3.60	5.09
			IWB25207	4B	68.9	65.9	71.9	C/T	10a	3.68	5.22
			IWB72120	4B	92.9	89.9	95.9	C/T	-111	3.31	4.60
			IWB73979	5B	14.7	11.7	17.7	C/T	-96.7	3.18	4.38
			IWB54773	5B	93.9	90.9	96.9	C/T	-142	3.91	5.61
			IWA7288	6A	5.1	2.1	8.1	C/T	20a	3.28	4.56
			IWB54807	6A	130	127	133	A/G	-165	3.27	4.54
			IWB71546	6B	94.8	91.8	97.8	A/G	-148	5.53	8.43
			IWB45581	6B	155.1	152.1	158.1	A/G	-138	4.13	6.00
			IWB74369	7A	108.3	105.3	111.3	A/G	10a	3.20	4.42
			IWB58341	7A	131.3	128.3	134.3	A/G	-74.9	3.45	4.83
			IWB28063	7A	181.8	178.8	184.8	A/G	10a	4.62	6.83
			Global R2 of the multiple QTL model								73.90
			IWB63226	1A	46.8	43.8	49.8	C/T	-142	3.27	4.01
			IWB8612	1B	43.6	40.6	46.6	G/T	20a	4.98	6.61
			IWB35332	1B	54.8	51.8	57.8	A/G	20a	4.77	6.28
			IWA2526	2A	46.6	43.6	49.6	C/T	-197	4.49	5.84
			IWB71685	2A	96.2	93.2	99.2	C/T	10a	3.00	3.61
			IWB73313	2A	108.7	105.7	111.7	G/T	20a	4.05	5.17
			IWA3868	2B	45.1	42.1	48.1	C/T	-206	4.44	5.77
			IWB20248	3A	128.7	125.7	131.7	A/G	20a	3.21	3.92
			IWB69546	3A	165.9	162.9	168.9	A/G	-127	3.41	4.22
			IWB64176	3B	2.9	-0.1	5.9	G/T	10a	3.56	4.44
			IWB1757	3B	32	29	35	A/C	-210	4.89	6.47
NDVI	UAV-RedEdge	98	IWB71905	3B	146.4	143.4	149.4	C/T	10a	3.35	4.13
			IWB71809	4A	167.6	164.6	170.6	A/G	-135	3.41	4.22
			IWB28274	4B	4.8	1.8	7.8	C/T	10a	3.04	3.67
			IWB72120	4B	92.9	89.9	95.9	C/T	-178	3.00	3.62
			IWB72539	4B	114	111	117	C/T	-212	4.26	5.49
			IWA3583	5A	112.1	109.1	115.1	A/G	2.0a	4.37	5.66
			IWB73979	5B	14.7	11.7	17.7	C/T	-191	4.13	5.29
			IWB69162	5B	106	103	109	A/C	1.0a	3.54	4.41
			IWB53754	6A	2	-1	5	A/G	-187	3.05	3.69
			IWB14365	6A	93.4	90.4	96.4	A/G	-131	3.40	4.20
			IWA929	6A	121.2	118.2	124.2	C/T	1.0a	3.15	3.83
			IWB71546	6B	94.8	91.8	97.8	A/G	-238	5.05	6.71
			IWB28063	7A	181.8	178.8	184.8	A/G	2.0a	3.85	4.88
			IWB73291	7B	44.3	41.3	47.3	A/G	-165	4.04	5.16
			IWB68886	7B	82.1	79.1	85.1	C/T	2.0a	3.07	3.71
			Global R2of the multiple QTL model								91.70
